# Supplementary material for: Development of a Risk Predictive Model for Erectile Dysfunction at 12 months after COVID-19 Recovery: A Prospective Observational Study
Source: Preprints.org preprint supplement (doi:10.20944/preprints202409.0904.v1), 2024-09-11
Supplement: Supplementary file 1 [file supplementary]

Table S1. Characteristics of the patients of the final sample.

| **VARIABLE** | | **HISTORY OF COVID-19** | |
| --- | --- | --- | --- |
| NO  (*N*= 195) | YES  (*N*=166) |
| Age (year, interquartile range) |  | 55 (15) | 55 (14) |
| BMI (kg/m2) |  | 26.3 (5) | 28 (6) |
| Highest level of education  (case (%)) | Primary | 25 (34.7) | 47 (65.3) |
| Secondary | 43 (37.4) | 72 (62.6) |
| University | 126 (73.3) | 46 (26.7) |
| Occupation (case (%)) | Directors | 8 (34.8) | 15 (65.2) |
| Scientists | 100 (73) | 37 (27) |
| Technicals | 6 (37.5) | 10 (62.5) |
| Accountants | 10 (62.5) | 6 (37.5) |
| Restauration | 16 (51.6) | 15 (48.4) |
| Agriculture | 1 (12.5) | 7 (87.5) |
| Industry | 20 (44.4) | 25 (55.6) |
| Assemblers | 3 (17.6) | 14 (82.4) |
| Elementary | 1 (25) | 3 (75) |
| Military | 2 (100) | 0 (0) |
| Retirement | 25 (44.6) | 31 (55.4) |
| Unemployed | 3 (50) | 3 (50) |
| Physical activity (case (%)) | Low | 96 (50.8) | 93 (49.2) |
| Moderate | 78 (55.3) | 63 (44.7) |
| High | 21 (67.7) | 10 (32.3) |
| Civil status in couple (case (%)) |  | 173 (55.3) | 140 (44.7) |
| Living arrangements (case (%)) | Unipersonal | 17 (45.9) | 20 (54.1) |
| Monoparental | 4 (66.7) | 2 (33.3) |
| Couple without children | 79 (55.2) | 64 (44.8) |
| Couple with children | 9 (42.9) | 12 (57.1) |
| Alcohol (case (%)) |  | 97 (67.8) | 46 (32.2) |
| Smoking (case (%)) |  | 94 (48.5) | 100 (51.5) |
| Coffee (case (%)) |  | 159 (59.1) | 110 (40.9) |
| Ischemic heart disease (case (%)) |  | 5 (25) | 15 (75) |
| Hypertension (case (%)) |  | 45 (44.1) | 57 (55.9) |
| Atrial fibrillation (case (%)) |  | 6 (35.3) | 11 (64.7) |
| Heart failure (case (%)) |  | 1 (16.7) | 5 (83.3) |
| Stroke (case (%)) |  | 4 (30.8) | 9 (69.2) |
| PAD (case (%)) |  | 4 (50) | 4 (50) |
| Diabetes (case (%)) |  | 10 (33.3) | 20 (66.7) |
| OSAS (case (%)) |  | 11 (57.9) | 8 (42.1) |
| COPD (case (%)) |  | 3 (33.3) | 6 (66.7) |
| Hypothyroidism (case (%)) |  | 6 (60) | 4 (40) |
| Asthma (case (%)) |  | 12 (63.2) | 7 (36.8) |
| Chronic kidney failure (case (%)) |  | 6 (75) | 2 (25) |
| Chronic active hepatitis (case (%)) |  | 4 (66.7) | 2 (33.3) |
| Parkinson disease (case (%)) |  | 0 (0) | 0 (0) |
| Cancer (case (%)) |  | 6 (40) | 9 (60) |
| Anxiety/Depression (case (%)) |  | 6 (23.1) | 20 (76.9) |
| LUTS (case (%)) |  | 22 (56.4) | 17 (43.6) |
| Autoimmune disease (case (%)) |  | 2 (25) | 6 (75) |
| Statins (case (%)) |  | 29 (42) | 40 (58) |
| Non-thiazide diuretics (case (%)) |  | 39 (46.4) | 45 (53.6) |
| Beta blockers (case (%)) |  | 6 (18.8) | 26 (81.3) |
| Spironolactone (case (%)) |  | 1 (50) | 1 (50) |
| Corticoids (case (%)) |  | 2 (66.7) | 1 (33.3) |
| Acenocumarol (case (%)) |  | 5 (50) | 5 (50) |
| New oral anticoagulants (case (%)) |  | 1 (16.7) | 5 (83.3) |
| LMWH (case (%)) |  | 0 (0) | 0 (0) |
| Antiplatelet therapy (case (%)) |  | 12 (37.5) | 20 (62.5) |
| Benzodiazepines (case (%)) |  | 6 (26.1) | 17 (73.9) |
| Antidepressants (case (%)) |  | 1 (16.7) | 5 (83.3) |
| Anticholinergics (case (%)) |  | 5 (62.5) | 3 (37.5) |
| A1RA/5-ARI (case (%)) |  | 21 (55.3) | 17 (44.7) |
| Antipsychotics (case (%)) |  | 3 (100) | 0 (0) |
| ICU admission (case (%)) |  | - | 24 (14.5) |
| ED (case (%)) |  | 83 (44.1) | 105 (55.9) |
| SARS-cov-2 Vaccination |  | 191 (54.6) | 159 (45.4) |

Values are expressed as number (%) and median (interquartile range). BMI=body mass index; PAD=peripheral arterial disease. OSAS=obstructive sleep apnoea syndrome. COPD=chronic obstructive pulmonary disease. LMWH=low molecular weight heparin. A1RA=alfa-1 receptors antagonists. 5-ARI=5-alfa reductase inhibitors. ICU=intensive care unit. ED=Erectile dysfunction.
